# Supplementary material for: Two-stage deep learning approach for screening disk displacement of the temporomandibular joint using orthopantomogram
Source: Research Square preprint supplement (doi:10.21203/rs.3.rs-7053119/v1), 2025-07-30
Supplement: Supplementary file 1 [file 20997c08ca62cb3158918649.docx]

**Supplementary Materials**

**Two-stage deep learning approach for screening disk displacement of the temporomandibular joint using orthopantomogram**

Jong-Soo Kim1†, Taehyeong Kim2†, Yong-Hee Ahn3, Hong-Gee Kim4, Sug-Joon Ahn5*

1. Mean-Variance Loss Formulation

To optimize the model for both categorical classification and continuous severity estimation, we incorporated a hybrid loss function approach combining mean-variance loss [1] with standard cross-entropy loss. Based on the output probability distribution from the softmax layer, we can compute the mean () and variance () for each sample as follows:

Here, ∈ {0*,* 1*,* 2} represents the class label (normal disk positioning [NR] = 0, disk displacement with reduction [DDR] = 1, and disk displacement without reduction [DDNR] = 2), is the total number of classes (), and denotes the probability that sample belongs to class .

For a batch of training samples with batch size , the mean loss component is calculated as:

where is the ground-truth value for sample .

The variance loss component penalizes the dispersion of the estimated distribution and is defined as:

The mean-variance loss aims at penalizing not only the difference between the mean () of an estimated distribution and the ground-truth value, but also the variance (*vi*) of the estimated distribution. The complete loss function can be formulated as:

where represents the standard cross-entropy loss, and the hyperparameters and balance the influence of individual loss components. This approach allows the model to output not only categorical classifications but also meaningful continuous severity scores, allowing for fine-grained assessment of temporomandibular joint (TMJ) disk displacement (DD) severity beyond discrete categorization.

2. Implementation Details

To develop our two-stage TMJ-PanoNet, we sequentially trained the region of interest (ROI) detection and TMJ DD classification models. The YOLOv5s detection model was trained using default hyperparameters from the official implementation to identify condylar regions in orthopantomogram (OTG) images. As a result, the model successfully detected two ROIs (left and right condylar regions) in all OTG images of the TMJ DD classification dataset.

For the TMJ DD classification stage, we applied data augmentation techniques during training. Specifically, we resized the detected ROIs to 256256 pixels and then performed random cropping to 224224 pixels, which helped the model become robust to slight variations in condylar positioning. The classification network was trained for 200 epochs using the Adam optimizer [2] with an initial learning rate of . We implemented a step learning rate scheduler that reduced the learning rate by a factor of 0.97 every three epochs, allowing for gradual refinement of the model parameters throughout training. For the mean-variance loss function, we set both hyperparameters and to 1, balancing the influence of mean loss and variance loss components equally with the cross-entropy loss.

The best-performing model was selected based on the lowest mean absolute error (MAE) achieved on the validation dataset. We evaluated the model’s generalization performance using an independent test set that was completely unseen during model development, ensuring a realistic assessment of its clinical applicability. This approach ensured that our model performed reliably on new data while minimizing overfitting to the training samples.

3. Evaluation Metrics for Severity Estimation

To evaluate the model’s capability in estimating the progression of TMJ DD beyond categorical classification, we examined the continuous severity estimation using the coefficient of determination (*R*2), Pearson’s correlation coefficient (*r*), mean squared error (MSE), and MAE. These metrics allowed us to assess how well the model’s continuous predictions aligned with the expert-annotated magnetic resonance imaging (MRI)-verified classifications. The formulations of these metrics are provided in the following equations.

In these equations, represents the MRI-verified categorical classification converted to numerical scores (NR = 0, DDR = 1, and DDNR = 2), represents the model’s predicted values, and represent the mean values of the respective distributions, anddenotes the total number of samples in the test set.

**References**

1. Pan, H., Han, H., Shan, S. & Chen, X. Mean-variance loss for deep age estimation from a face. *IEEE*. *Conf*. *Comput*. *Vis*. *Pattern*. *Recognit*. 5285-5294 (2018).

2. Diederik, K. P. & Ba, J. Adam: A method for stochastic optimization. 489 arXiv preprint arXiv:1412.6980 (2014).

**Supplementary Table S1**

Magnetic resonance imaging conditions in this study

|  | Conditions | |
| --- | --- | --- |
| Model | Signa Horizon (GE, Waukesha, WI) | Magnetom Vita (Siemens, Erlangen, Germany) |
| Operation | 1.5 T with unilateral 3-inch surface receiver coil | 3 T with 64 channel head and neck coil |
| T1 weighted pulse | TR 600 ms and TE 12 ms (Sagittal)* TR 500 ms and TE 12 ms (Coronal) | - |
| T2 weighted pulse | - | TR 4500 ms/5000 ms and TE 74 ms/72 ms (Sagittal and Coronal)* |
| Proton density pulse sequence | TR 4000 ms and TE 14ms (Sagittal)* | TR 2500 ms/2000 ms and TE 34 ms/22 ms (Sagittal and Coronal)* |
| Others | 3 mm slice thickness, 10 cm field of view, 2 excitations, and image matrix of 254192 pixels | 2 mm slice thickness and 120 mm field of view |

*The scans were acquired in the open- and close-mouth positions
